# Supplementary material for: Reverse design of high-detonation-velocity organic energetic compounds based on an accurate BPNN with wide applicability
Source: Royal Society of Chemistry journal article supplement (doi:10.1039/d4ta07833k), 2024-12-09
Supplement: d4ta07833k1.pdf [file d4ta07833k1.pdf]

# **Reverse design of high-detonation-velocity organic energetic compounds based on an accurate BPNN with wide applicability**

Qiong Wu<sup>a,b,c,#</sup>, Guan-chen Dong<sup>a,b,#</sup>, Shuai-yu Wang<sup>a,b</sup>, Xin-yu Wang<sup>a,b</sup>, Bin Yan<sup>a</sup>, Wei-hua Zhu<sup>a</sup>,

Jing Lv<sup>a,b,\*</sup>, Ling-hua Tan<sup>a,b,\*</sup>

<sup>a</sup> *School of Chemistry and Chemical Engineering, Nanjing University of Science and Technology, Nanjing 210094, China*

<sup>b</sup> *National Special Superfine Powder Engineering Research Center, Nanjing University of Science and Technology, Nanjing 210014, China*

<sup>c</sup> *School of Materials Science and Engineering, Jiangsu Key Laboratory of Advanced Structural Materials and Application Technology, Nanjing Institute of Technology, Nanjing 211167, China*

# Qiong Wu and Guan-chen Dong contributed equally to this paper;

\*Corresponding author: Ling-hua Tan and Jing Lv;

Email address: tanlh@njust.edu.cn (Ling-hua Tan) and lvjing9487@163.com (Jing Lv)

## Supplementary Information

Table S1: The initial dataset for the ML; Table S2: The Pearson's correlation coefficients of descriptors for detonation velocity ( $D$ ); Table S3: The setting of the RF model; Table S4: The setting of the SVR model;

Table S5: The setting of the MLP model; Table S6: The setting of the BPNN model; Table S7: The predicted  $D$  values of compounds in the test set; Table S8: The dataset of new test set 1; Table S9: The new dataset of new modified ML model; Table S10: The dataset of new energetic compounds; Table S11: The predicted  $D$  values of isomers; Figure S1: The loss function of ML models; Figure S2: The relationships between  $nC/V_m$ ,  $nH/V_m$ ,  $V_m$ ,  $M$ ,  $OB$ ,  $F$  and experimental  $D$ ; Figure S3: The scatter graph of the training/test set; Figure S4: The predicted residual plot of models for the  $D$ ; Figure S5: The Williams plot of models for the test set of the  $D$ .

**Table S1.** The initial dataset for the ML.<sup>1</sup>

| NO.                 | Structure                                                                           | $\rho$ | $nO/V_m$ | $nN/V_m$ | $nC/V_m$ | $nH/V_m$ | $V_m$  | $M$   | OB     | $F$  |
|---------------------|-------------------------------------------------------------------------------------|--------|----------|----------|----------|----------|--------|-------|--------|------|
| <b>Training set</b> |                                                                                     |        |          |          |          |          |        |       |        |      |
| 1                   | 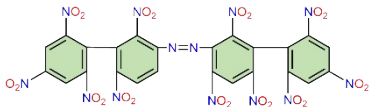   | 1.64   | 0.045    | 0.026    | 0.045    | 0.011    | 532.90 | 874.0 | -0.494 | 5.47 |
| 2                   |    | 1.78   | 0.049    | 0.029    | 0.049    | 0.012    | 490.99 | 874.0 | -0.494 | 5.47 |
| 3                   |    | 1.80   | 0.044    | 0.037    | 0.044    | 0.037    | 135.02 | 243.0 | -0.560 | 4.83 |
| 4                   |    | 1.43   | 0.035    | 0.029    | 0.035    | 0.029    | 170.32 | 243.0 | -0.560 | 4.83 |
| 5                   |    | 1.38   | 0.034    | 0.028    | 0.034    | 0.028    | 176.37 | 243.0 | -0.560 | 4.83 |
| 6                   |    | 1.38   | 0.049    | 0.014    | 0.028    | 0.056    | 142.05 | 196.0 | -0.408 | 5.86 |
| 7                   |    | 1.76   | 0.047    | 0.031    | 0.047    | 0.023    | 257.97 | 454.0 | -0.529 | 5.22 |
| 8                   |    | 1.55   | 0.044    | 0.025    | 0.038    | 0.038    | 158.73 | 246.0 | -0.520 | 5.15 |
| 9                   |   | 1.48   | 0.042    | 0.024    | 0.036    | 0.036    | 166.24 | 246.0 | -0.520 | 5.15 |
| 10                  |  | 1.63   | 0.046    | 0.027    | 0.040    | 0.040    | 150.94 | 246.0 | -0.520 | 5.15 |
| 11                  |  | 1.89   | 0.051    | 0.051    | 0.026    | 0.051    | 156.66 | 296.1 | -0.216 | 6.08 |
| 12                  |  | 1.60   | 0.043    | 0.043    | 0.022    | 0.043    | 185.05 | 296.1 | -0.216 | 6.08 |
| 13                  |  | 1.40   | 0.038    | 0.038    | 0.019    | 0.038    | 211.49 | 296.1 | -0.216 | 6.08 |
| 14                  |  | 1.20   | 0.032    | 0.032    | 0.016    | 0.032    | 246.73 | 296.1 | -0.216 | 6.08 |
| 15                  |  | 1.00   | 0.027    | 0.027    | 0.014    | 0.027    | 296.08 | 296.1 | -0.216 | 6.08 |
| 16                  |  | 0.75   | 0.020    | 0.020    | 0.010    | 0.020    | 394.77 | 296.1 | -0.216 | 6.08 |
| 17                  |  | 1.60   | 0.042    | 0.028    | 0.042    | 0.014    | 282.50 | 452.0 | -0.496 | 5.27 |
| 18                  |  | 1.60   | 0.043    | 0.021    | 0.050    | 0.021    | 281.25 | 450.0 | -0.676 | 5.21 |
| 19                  |  | 1.70   | 0.045    | 0.023    | 0.053    | 0.023    | 264.71 | 450.0 | -0.676 | 5.21 |

|    |                                                                                     |      |       |       |       |       |         |       |        |      |
|----|-------------------------------------------------------------------------------------|------|-------|-------|-------|-------|---------|-------|--------|------|
| 20 | 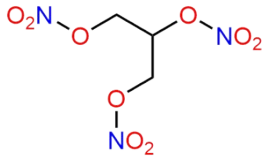   | 1.60 | 0.063 | 0.021 | 0.021 | 0.035 | 141.87  | 227.0 | 0.035  | 7.29 |
| 21 |    | 1.70 | 0.048 | 0.024 | 0.048 | 0.013 | 373.51  | 635.0 | -0.517 | 5.64 |
| 22 |                                                                                     | 1.78 | 0.034 | 0.068 | 0.017 | 0.068 | 58.46   | 104.1 | -0.308 | 4.20 |
| 23 |    | 1.62 | 0.031 | 0.062 | 0.016 | 0.062 | 64.23   | 104.1 | -0.308 | 4.20 |
| 24 |                                                                                     | 1.55 | 0.030 | 0.060 | 0.015 | 0.060 | 67.14   | 874.0 | -0.308 | 4.20 |
| 25 |                                                                                     | 1.55 | 0.030 | 0.060 | 0.015 | 0.060 | 67.14   | 874.0 | -0.308 | 4.20 |
| 26 |                                                                                     | 1.76 | 0.067 | 0.022 | 0.028 | 0.045 | 179.55  | 243.0 | -0.101 | 6.92 |
| 27 |                                                                                     | 1.70 | 0.065 | 0.022 | 0.027 | 0.043 | 185.88  | 243.0 | -0.101 | 6.92 |
| 28 |                                                                                     | 1.67 | 0.063 | 0.021 | 0.026 | 0.042 | 189.22  | 243.0 | -0.101 | 6.92 |
| 29 |                                                                                     | 1.60 | 0.061 | 0.020 | 0.025 | 0.041 | 197.50  | 104.1 | -0.101 | 6.92 |
| 30 |                                                                                     | 1.45 | 0.055 | 0.018 | 0.023 | 0.037 | 217.93  | 104.1 | -0.101 | 6.92 |
| 31 |   | 1.23 | 0.047 | 0.016 | 0.019 | 0.031 | 256.91  | 316.0 | -0.101 | 6.92 |
| 32 |                                                                                     | 0.99 | 0.038 | 0.013 | 0.016 | 0.025 | 319.19  | 316.0 | -0.101 | 6.92 |
| 33 |                                                                                     | 0.88 | 0.033 | 0.011 | 0.014 | 0.022 | 359.09  | 316.0 | -0.101 | 6.92 |
| 34 |                                                                                     | 0.50 | 0.019 | 0.006 | 0.008 | 0.013 | 632.00  | 316.0 | -0.101 | 6.92 |
| 35 |                                                                                     | 0.48 | 0.018 | 0.006 | 0.008 | 0.012 | 658.33  | 316.0 | -0.101 | 6.92 |
| 36 |                                                                                     | 0.30 | 0.011 | 0.004 | 0.005 | 0.008 | 1053.33 | 316.0 | -0.101 | 6.92 |
| 37 |                                                                                     | 0.25 | 0.009 | 0.003 | 0.004 | 0.006 | 1264.00 | 316.0 | -0.101 | 6.92 |
| 38 |  | 1.76 | 0.054 | 0.023 | 0.046 | 0.023 | 130.11  | 316.0 | -0.454 | 5.61 |
| 39 |                                                                                     | 1.71 | 0.052 | 0.022 | 0.045 | 0.022 | 133.91  | 316.0 | -0.454 | 5.61 |
| 40 |                                                                                     | 1.60 | 0.049 | 0.021 | 0.042 | 0.021 | 143.12  | 316.0 | -0.454 | 5.61 |
| 41 |                                                                                     | 1.70 | 0.052 | 0.022 | 0.045 | 0.022 | 134.70  | 316.0 | -0.454 | 5.61 |
| 42 |                                                                                     | 1.80 | 0.049 | 0.049 | 0.024 | 0.049 | 123.37  | 316.0 | -0.216 | 6.08 |
| 43 |  | 1.77 | 0.048 | 0.048 | 0.024 | 0.048 | 125.46  | 229.0 | -0.216 | 6.08 |
| 44 |                                                                                     | 1.77 | 0.048 | 0.048 | 0.024 | 0.048 | 125.81  | 229.0 | -0.216 | 6.08 |
| 45 |                                                                                     | 1.72 | 0.046 | 0.046 | 0.023 | 0.046 | 129.10  | 229.0 | -0.216 | 6.08 |
| 46 |                                                                                     | 1.70 | 0.046 | 0.046 | 0.023 | 0.046 | 130.62  | 229.0 | -0.216 | 6.08 |

|    |                                                                                     |      |       |       |       |       |        |       |        |       |
|----|-------------------------------------------------------------------------------------|------|-------|-------|-------|-------|--------|-------|--------|-------|
| 47 |                                                                                     | 1.66 | 0.045 | 0.045 | 0.022 | 0.045 | 133.77 | 222.1 | -0.216 | 6.08  |
| 48 |                                                                                     | 1.60 | 0.043 | 0.043 | 0.022 | 0.043 | 138.79 | 222.1 | -0.216 | 6.08  |
| 49 |                                                                                     | 1.46 | 0.039 | 0.039 | 0.020 | 0.039 | 152.10 | 222.1 | -0.216 | 6.08  |
| 50 |                                                                                     | 1.40 | 0.038 | 0.038 | 0.019 | 0.038 | 158.61 | 222.1 | -0.216 | 6.08  |
| 51 |                                                                                     | 1.29 | 0.035 | 0.035 | 0.017 | 0.035 | 172.14 | 222.1 | -0.216 | 6.08  |
| 52 |                                                                                     | 1.20 | 0.032 | 0.032 | 0.016 | 0.032 | 185.05 | 222.1 | -0.216 | 6.08  |
| 53 |                                                                                     | 1.10 | 0.030 | 0.030 | 0.015 | 0.030 | 201.87 | 222.1 | -0.216 | 6.08  |
| 54 |                                                                                     | 1.00 | 0.027 | 0.027 | 0.014 | 0.027 | 222.06 | 222.1 | -0.216 | 6.08  |
| 55 |                                                                                     | 0.95 | 0.026 | 0.026 | 0.013 | 0.026 | 233.75 | 222.1 | -0.216 | 6.08  |
| 56 |                                                                                     | 0.70 | 0.019 | 0.019 | 0.009 | 0.019 | 317.23 | 222.1 | -0.216 | 6.08  |
| 57 |                                                                                     | 0.56 | 0.015 | 0.015 | 0.008 | 0.015 | 396.54 | 222.1 | -0.216 | 6.08  |
| 58 | 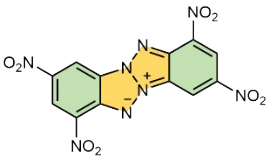   | 1.85 | 0.038 | 0.038 | 0.057 | 0.019 | 209.75 | 388.0 | -0.742 | 4.08  |
| 59 |  | 1.88 | 0.044 | 0.044 | 0.044 | 0.044 | 137.27 | 258.1 | -0.558 | 4.52  |
| 60 |  | 1.85 | 0.043 | 0.043 | 0.043 | 0.043 | 139.49 | 258.1 | -0.558 | 4.52  |
| 61 |                                                                                     | 1.73 | 0.048 | 0.030 | 0.042 | 0.030 | 165.91 | 287.0 | -0.474 | 5.70  |
| 62 |                                                                                     | 1.71 | 0.048 | 0.030 | 0.042 | 0.030 | 167.85 | 287.0 | -0.474 | 5.70  |
| 63 |  | 1.68 | 0.047 | 0.029 | 0.041 | 0.029 | 170.85 | 287.0 | -0.474 | 5.70  |
| 64 |                                                                                     | 1.61 | 0.045 | 0.028 | 0.039 | 0.028 | 178.27 | 287.0 | -0.474 | 5.70  |
| 65 |                                                                                     | 1.36 | 0.038 | 0.024 | 0.033 | 0.024 | 211.04 | 287.0 | -0.474 | 5.70  |
| 66 |                                                                                     | 1.20 | 0.033 | 0.021 | 0.029 | 0.021 | 239.18 | 287.0 | -0.474 | 5.70  |
| 67 |                                                                                     | 1.64 | 0.043 | 0.022 | 0.051 | 0.036 | 138.43 | 227.0 | -0.740 | 5.11  |
| 68 |                                                                                     | 1.45 | 0.038 | 0.019 | 0.045 | 0.032 | 156.57 | 227.0 | -0.740 | 5.11  |
| 69 |  | 1.36 | 0.036 | 0.018 | 0.042 | 0.030 | 166.93 | 227.0 | -0.740 | 5.11  |
| 70 |                                                                                     | 1.00 | 0.026 | 0.013 | 0.031 | 0.022 | 227.02 | 227.0 | -0.740 | 5.11  |
| 71 |                                                                                     | 0.80 | 0.021 | 0.011 | 0.025 | 0.018 | 283.78 | 227.0 | -0.740 | 5.11  |
| 72 |                                                                                     | 0.73 | 0.019 | 0.010 | 0.023 | 0.016 | 310.14 | 227.0 | -0.740 | 5.11  |
| 73 |  | 1.86 | 0.044 | 0.044 | 0.044 | 0.000 | 135.48 | 252.0 | -0.381 | -0.30 |
| 74 |                                                                                     | 1.76 | 0.042 | 0.042 | 0.042 | 0.000 | 143.18 | 252.0 | -0.381 | -0.30 |

|                 |                                                                                     |      |       |       |       |       |        |       |        |       |
|-----------------|-------------------------------------------------------------------------------------|------|-------|-------|-------|-------|--------|-------|--------|-------|
| 75              | 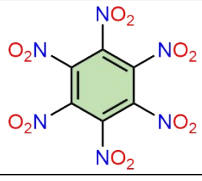   | 1.97 | 0.068 | 0.034 | 0.034 | 0.000 | 176.62 | 347.9 | 0.000  | 6.91  |
| 76              |    | 1.74 | 0.031 | 0.062 | 0.031 | 0.000 | 193.14 | 336.1 | -0.286 | 3.58  |
| 77              |    | 1.62 | 0.043 | 0.043 | 0.022 | 0.065 | 92.63  | 150.1 | -0.320 | 5.91  |
| 78              |    | 1.51 | 0.026 | 0.052 | 0.026 | 0.052 | 115.06 | 174.1 | -0.551 | -0.43 |
| 79              |   | 1.79 | 0.060 | 0.037 | 0.022 | 0.037 | 133.75 | 239.0 | -0.033 | 6.72  |
| 80              |  | 1.66 | 0.047 | 0.023 | 0.047 | 0.023 | 128.16 | 213.0 | -0.563 | 5.57  |
| <b>Test set</b> |                                                                                     |      |       |       |       |       |        |       |        |       |
| 1               |  | 1.77 | 0.064 | 0.028 | 0.028 | 0.028 | 217.58 | 386.0 | -0.041 | 6.25  |
| 2               |  | 1.68 | 0.048 | 0.021 | 0.048 | 0.035 | 144.65 | 243.0 | -0.625 | 5.19  |
| 3               |  | 1.72 | 0.045 | 0.030 | 0.045 | 0.030 | 132.57 | 228.0 | -0.561 | 5.17  |
| 4               |  | 1.57 | 0.045 | 0.019 | 0.045 | 0.032 | 154.78 | 243.0 | -0.625 | 5.19  |

|    |                                                                                     |      |       |       |       |       |        |       |        |      |
|----|-------------------------------------------------------------------------------------|------|-------|-------|-------|-------|--------|-------|--------|------|
| 5  | 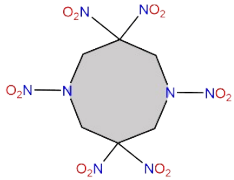   | 1.85 | 0.058 | 0.038 | 0.029 | 0.038 | 208.15 | 384.0 | -0.167 | 6.31 |
| 6  |    | 1.85 | 0.055 | 0.047 | 0.023 | 0.031 | 127.93 | 236.0 | -0.068 | 6.19 |
| 7  |    | 1.59 | 0.043 | 0.025 | 0.043 | 0.018 | 276.10 | 439.0 | -0.528 | 5.42 |
| 8  |    | 1.68 | 0.060 | 0.030 | 0.022 | 0.030 | 133.49 | 224.0 | 0.000  | 6.86 |
| 9  |    | 1.93 | 0.053 | 0.053 | 0.026 | 0.026 | 226.97 | 438.1 | -0.110 | 6.25 |
| 10 |                                                                                     | 1.86 | 0.051 | 0.051 | 0.025 | 0.025 | 235.52 | 438.1 | -0.110 | 6.25 |
| 11 |                                                                                     | 1.33 | 0.036 | 0.036 | 0.018 | 0.018 | 330.11 | 438.1 | -0.110 | 6.25 |
| 12 |   | 1.88 | 0.051 | 0.051 | 0.025 | 0.051 | 78.74  | 148.0 | -0.216 | 5.07 |
| 13 |  | 1.78 | 0.048 | 0.048 | 0.024 | 0.048 | 83.17  | 148.0 | -0.216 | 5.07 |
| 14 | $\text{H}_3\text{C}-\text{NO}_2$                                                    | 1.13 | 0.037 | 0.018 | 0.018 | 0.055 | 54.10  | 61.0  | -0.393 | 6.04 |
| 15 |  | 1.91 | 0.044 | 0.053 | 0.035 | 0.035 | 112.94 | 216.1 | -0.370 | 3.36 |

**Table S2.** The calculated Pearson's correlation coefficients of nine descriptors for the ML of *D*.

| Parament      | $\rho$ | nO/ $V_m$ | nN/ $V_m$ | nC/ $V_m$ | nH/ $V_m$ | $V_m$   | $M$     | OB     | $F$     |
|---------------|--------|-----------|-----------|-----------|-----------|---------|---------|--------|---------|
| PCC- <i>D</i> | 0.9381 | 0.7756    | 0.7605    | 0.3410    | 0.4220    | -0.6937 | -0.0011 | 0.1437 | -0.2027 |



**Table S3.** The setting of the RF model.

| NO. | Parameter Name        | Parameter settings |
|-----|-----------------------|--------------------|
| 1   | bootstrap             | True               |
| 2   | ccp_alpha             | 0.0                |
| 3   | criterion             | mse                |
| 4   | max_depth             | None               |
| 5   | max_features          | auto               |
| 6   | max_leaf_nodes        | None               |
| 7   | max_samples           | None               |
| 8   | min_impurity_decrease | 0.0                |
| 9   | min_samples_leaf      | 1                  |
| 10  | n_estimators          | 200                |

**Table S4.** The setting of the SVR model.

| NO. | Parameter Name | Parameter settings |
|-----|----------------|--------------------|
| 1   | C              | 1.0                |
| 2   | cache_size     | 200M               |
| 3   | coef0          | 0                  |
| 4   | degree         | 10                 |
| 5   | epsilon        | 0.1                |
| 6   | gamma          | Scale              |
| 7   | kernel         | rbf                |
| 8   | max_iter       | -1                 |

**Table S5.** The setting of the MLP model.

| NO. | Parameter Name      | Parameter settings    |
|-----|---------------------|-----------------------|
| 1   | Input Layer Nodes   | 9                     |
| 2   | Hidden Layer Nodes  | 30                    |
| 3   | Output Layer Nodes  | 1                     |
| 4   | Activation function | tanh                  |
| 5   | Learning rate       | 0.001                 |
| 6   | Error               | $0.65 \times 10^{-3}$ |
| 7   | Epochs              | 2000                  |
| 8   | Optimization solver | Sgd                   |
| 9   | Loss function       | MSE                   |

**Table S6.** The setting of the BPNN model.

| NO. | Parameter Name      | Parameter settings   |
|-----|---------------------|----------------------|
| 1   | Input Layer Nodes   | 9                    |
| 2   | Hidden Layer Nodes  | 40                   |
| 3   | Output Layer Nodes  | 1                    |
| 4   | Activation function | tanh                 |
| 5   | Training function   | trainIm              |
| 6   | Learning rate       | 0.001                |
| 7   | Error               | $0.65 \cdot 10^{-3}$ |
| 8   | Epochs              | 4000                 |
| 9   | Optimization solver | RMSprop              |
| 10  | Loss function       | MSE                  |

**Table S7.** The predicted  $D$  ( $\text{km}\cdot\text{s}^{-1}$ ) values of fifteen compounds in the test set.

| NO. | Structure                                                                           | Exp.  | BPNN  | MLP   | RF    |
|-----|-------------------------------------------------------------------------------------|-------|-------|-------|-------|
| 1   | 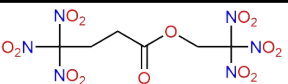   | 8.326 | 8.206 | 7.997 | 8.337 |
| 2   |    | 6.850 | 7.105 | 7.467 | 7.157 |
| 3   |    | 7.300 | 7.474 | 7.633 | 7.482 |
| 4   |    | 6.800 | 6.812 | 7.209 | 6.912 |
| 5   |   | 8.800 | 8.778 | 8.305 | 8.622 |
| 6   |  | 9.180 | 9.199 | 8.293 | 8.721 |
| 7   |  | 6.993 | 7.105 | 7.322 | 7.128 |
| 8   |  | 8.302 | 8.215 | 7.708 | 7.928 |
| 9   |  | 9.560 | 9.443 | 8.615 | 8.913 |
| 10  |  | 9.102 | 9.171 | 8.434 | 8.832 |
| 11  |  | 7.000 | 7.131 | 6.914 | 6.845 |
| 12  |  | 8.792 | 8.935 | 8.533 | 8.850 |
| 13  |  | 8.430 | 8.547 | 8.268 | 8.695 |
| 14  | $\text{H}_3\text{C}-\text{NO}_2$                                                    | 6.290 | 6.191 | 6.372 | 6.719 |
| 15  |  | 8.500 | 8.383 | 8.563 | 8.525 |

**Table S8.** The dataset of new test set 1.<sup>2-14</sup>

| NO.   | Structure                                                                           | $\rho$ | nO/ $V_m$ | nN/ $V_m$ | nC/ $V_m$ | nH/ $V_m$ | $V_m$  | $M$   | OB     | $F$  |
|-------|-------------------------------------------------------------------------------------|--------|-----------|-----------|-----------|-----------|--------|-------|--------|------|
| 1(P1) | 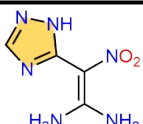   | 1.71   | 0.020     | 0.060     | 0.040     | 0.060     | 99.47  | 170.1 | -0.847 | 1.84 |
| 2(P2) |    | 1.70   | 0.017     | 0.060     | 0.043     | 0.060     | 115.95 | 197.1 | -0.933 | 1.49 |
| 3(P3) |    | 1.80   | 0.028     | 0.070     | 0.028     | 0.028     | 142.28 | 256.1 | -0.375 | 3.42 |
| 4(P4) |    | 1.77   | 0.041     | 0.048     | 0.034     | 0.021     | 145.22 | 257.0 | -0.342 | 3.48 |
| 5     |    | 1.91   | 0.056     | 0.044     | 0.033     | 0.000     | 180.09 | 344.0 | -0.093 | 2.11 |
| 6     |  | 1.83   | 0.021     | 0.075     | 0.032     | 0.053     | 93.50  | 171.1 | -0.608 | 1.94 |
| 7     |  | 1.87   | 0.041     | 0.050     | 0.041     | 0.008     | 241.05 | 450.0 | -0.391 | 3.25 |
| 8     |  | 1.81   | 0.044     | 0.044     | 0.039     | 0.022     | 181.24 | 328.0 | -0.390 | 4.53 |
| 9     |  | 1.82   | 0.016     | 0.082     | 0.033     | 0.016     | 122.03 | 222.1 | -0.504 | 1.52 |
| 10    |  | 1.80   | 0.018     | 0.073     | 0.037     | 0.037     | 108.94 | 196.1 | -0.653 | 1.66 |
| 1     |  | 1.800  | 0.048     | 0.043     | 0.034     | 0.014     | 207.23 | 373.0 | -0.236 | 5.28 |

|    |  |      |       |       |       |       |        |       |        |      |
|----|--|------|-------|-------|-------|-------|--------|-------|--------|------|
| 12 |  | 1.82 | 0.052 | 0.044 | 0.030 | 0.009 | 229.67 | 418.0 | -0.115 | 5.68 |
| 13 |  | 1.91 | 0.041 | 0.059 | 0.035 | 0.012 | 170.71 | 326.1 | -0.294 | 2.65 |
| 14 |  | 1.92 | 0.042 | 0.052 | 0.042 | 0.010 | 190.65 | 366.0 | -0.393 | 2.29 |
| 15 |  | 1.21 | 0.047 | 0.016 | 0.016 | 0.047 | 63.64  | 77.0  | -0.104 | 7.06 |
| 16 |  | 1.82 | 0.028 | 0.071 | 0.028 | 0.042 | 70.91  | 129.1 | -0.434 | 2.76 |
| 17 |  | 1.75 | 0.018 | 0.080 | 0.027 | 0.027 | 112.63 | 197.1 | -0.446 | 1.74 |
| 18 |  | 1.77 | 0.014 | 0.078 | 0.036 | 0.021 | 140.75 | 249.1 | -0.610 | 1.28 |
| 19 |  | 1.81 | 0.020 | 0.070 | 0.040 | 0.040 | 100.60 | 182.1 | -0.703 | 1.78 |
| 20 |  | 1.83 | 0.039 | 0.068 | 0.019 | 0.029 | 103.31 | 189.1 | -0.127 | 4.79 |
| 21 |  | 1.88 | 0.031 | 0.070 | 0.031 | 0.023 | 128.23 | 241.1 | -0.365 | 3.34 |
| 22 |  | 1.88 | 0.022 | 0.078 | 0.034 | 0.022 | 178.80 | 336.1 | -0.476 | 2.53 |
| 23 |  | 1.92 | 0.032 | 0.070 | 0.032 | 0.027 | 184.96 | 355.1 | -0.383 | 3.50 |
| 24 |  | 1.80 | 0.033 | 0.065 | 0.027 | 0.033 | 183.40 | 330.1 | -0.339 | 3.79 |

|    |  |      |       |       |       |       |        |       |        |      |
|----|--|------|-------|-------|-------|-------|--------|-------|--------|------|
| 25 |  | 1.70 | 0.035 | 0.059 | 0.023 | 0.035 | 85.32  | 145.1 | -0.276 | 2.97 |
| 26 |  | 1.88 | 0.039 | 0.065 | 0.026 | 0.039 | 77.15  | 145.1 | -0.276 | 2.97 |
| 27 |  | 1.86 | 0.043 | 0.058 | 0.029 | 0.014 | 138.73 | 258.0 | -0.186 | 1.60 |
| 28 |  | 1.90 | 0.039 | 0.055 | 0.039 | 0.024 | 126.87 | 241.1 | -0.431 | 3.29 |
| 29 |  | 1.76 | 0.025 | 0.058 | 0.042 | 0.042 | 120.21 | 211.1 | -0.720 | 1.45 |
| 30 |  | 1.73 | 0.033 | 0.049 | 0.041 | 0.033 | 122.72 | 212.1 | -0.604 | 1.47 |
| 31 |  | 1.82 | 0.042 | 0.049 | 0.035 | 0.021 | 141.62 | 257.0 | -0.342 | 1.24 |
| 32 |  | 1.89 | 0.039 | 0.056 | 0.039 | 0.011 | 178.86 | 338.1 | -0.379 | 3.25 |
| 33 |  | 1.88 | 0.039 | 0.054 | 0.039 | 0.015 | 202.69 | 381.1 | -0.399 | 3.89 |
| 34 |  | 1.88 | 0.033 | 0.061 | 0.039 | 0.017 | 179.30 | 337.1 | -0.451 | 3.24 |
| 35 |  | 1.76 | 0.030 | 0.059 | 0.037 | 0.015 | 135.26 | 238.1 | -0.470 | 1.37 |
| 36 |  | 1.83 | 0.041 | 0.055 | 0.034 | 0.000 | 146.46 | 268.0 | -0.239 | 2.75 |





**Table S9.** The new dataset of new modified ML model.<sup>15-27</sup>

| NO.                     | Structure                                                                           | $\rho$ | $nO/V_m$ | $nN/V_m$ | $nC/V_m$ | $nH/V_m$ | $V_m$  | $M$   | OB     | $F$  |
|-------------------------|-------------------------------------------------------------------------------------|--------|----------|----------|----------|----------|--------|-------|--------|------|
| <b>New training set</b> |                                                                                     |        |          |          |          |          |        |       |        |      |
| 1                       | 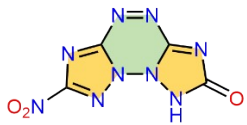   | 1.973  | 0.039    | 0.052    | 0.052    | 0.013    | 77.56  | 153.0 | -0.575 | 2.90 |
| 2                       |    | 1.998  | 0.028    | 0.085    | 0.028    | 0.014    | 141.19 | 282.1 | -0.284 | 3.15 |
| 3                       |    | 1.892  | 0.017    | 0.085    | 0.034    | 0.017    | 117.39 | 222.1 | -0.504 | 0.62 |
| 4                       |    | 1.903  | 0.020    | 0.078    | 0.039    | 0.020    | 101.99 | 194.1 | -0.577 | 0.71 |
| 5                       |   | 1.855  | 0.031    | 0.062    | 0.039    | 0.016    | 256.67 | 476.1 | -0.470 | 3.05 |
| 6                       |  | 1.700  | 0.041    | 0.048    | 0.027    | 0.041    | 145.92 | 248.1 | -0.322 | 3.68 |
| 7                       |  | 1.890  | 0.040    | 0.055    | 0.040    | 0.008    | 252.94 | 478.1 | -0.368 | 3.37 |
| 8                       |  | 1.800  | 0.019    | 0.065    | 0.047    | 0.028    | 214.53 | 386.2 | -0.787 | 1.65 |
| 9                       |  | 1.900  | 0.032    | 0.064    | 0.040    | 0.016    | 250.59 | 476.1 | -0.470 | 3.36 |
| 10                      |  | 1.760  | 0.018    | 0.072    | 0.036    | 0.036    | 111.42 | 196.1 | -0.653 | 3.70 |
| 11                      |  | 1.970  | 0.041    | 0.069    | 0.028    | 0.014    | 145.21 | 286.1 | -0.168 | 3.10 |

|    |                                                                                     |       |       |       |       |       |        |       |        |       |
|----|-------------------------------------------------------------------------------------|-------|-------|-------|-------|-------|--------|-------|--------|-------|
| 12 | 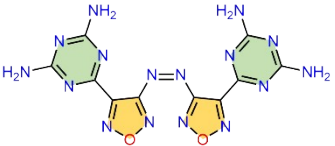   | 1.712 | 0.009 | 0.071 | 0.045 | 0.036 | 224.43 | 384.2 | -0.916 | -0.46 |
| 13 |    | 1.920 | 0.031 | 0.068 | 0.037 | 0.026 | 191.21 | 367.1 | -0.458 | 2.26  |
| 14 |    | 1.860 | 0.043 | 0.057 | 0.028 | 0.036 | 140.36 | 261.1 | -0.276 | 3.33  |
| 15 |    | 1.990 | 0.046 | 0.062 | 0.031 | 0.015 | 129.67 | 258.0 | -0.186 | 3.44  |
| 16 |    | 1.862 | 0.072 | 0.026 | 0.026 | 0.020 | 151.97 | 283.0 | 0.085  | 2.58  |
| 17 |    | 1.679 | 0.070 | 0.014 | 0.028 | 0.028 | 142.92 | 240.0 | 0.000  | 6.36  |
| 18 |    | 1.820 | 0.015 | 0.087 | 0.029 | 0.015 | 274.86 | 500.2 | -0.448 | -0.25 |
| 19 |   | 1.820 | 0.011 | 0.098 | 0.022 | 0.011 | 183.62 | 334.2 | -0.335 | -0.19 |
| 20 |  | 1.85  | 0.030 | 0.045 | 0.060 | 0.030 | 134.09 | 248.1 | -0.903 | 2.72  |
| 21 |  | 2.12  | 0.040 | 0.070 | 0.040 | 0.010 | 199.09 | 422.1 | -0.341 | 1.98  |
| 22 |  | 1.86  | 0.033 | 0.055 | 0.044 | 0.022 | 180.69 | 336.1 | -0.571 | 0.22  |
| 23 |  | 1.92  | 0.038 | 0.057 | 0.038 | 0.057 | 210.50 | 404.2 | -0.554 | 1.55  |
| 24 |  | 1.75  | 0.021 | 0.053 | 0.053 | 0.032 | 188.64 | 330.1 | -0.921 | -0.49 |
| 25 |  | 1.68  | 0.022 | 0.056 | 0.044 | 0.011 | 179.81 | 302.1 | -0.689 | -0.37 |

|    |                                                                                     |       |       |       |       |       |        |       |        |       |
|----|-------------------------------------------------------------------------------------|-------|-------|-------|-------|-------|--------|-------|--------|-------|
| 26 | 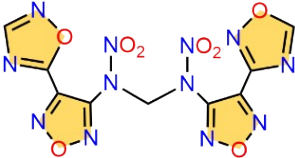   | 1.77  | 0.036 | 0.054 | 0.036 | 0.009 | 222.63 | 394.1 | -0.365 | 2.13  |
| 27 |    | 1.75  | 0.033 | 0.050 | 0.041 | 0.025 | 241.20 | 422.1 | -0.569 | 1.87  |
| 28 |    | 1.77  | 0.021 | 0.064 | 0.043 | 0.021 | 187.64 | 332.1 | -0.674 | -0.38 |
| 29 |    | 1.83  | 0.035 | 0.061 | 0.035 | 0.009 | 230.64 | 422.1 | -0.341 | 1.98  |
| 30 |    | 1.79  | 0.036 | 0.054 | 0.036 | 0.036 | 223.53 | 400.1 | -0.480 | 1.62  |
| 31 |    | 1.92  | 0.039 | 0.058 | 0.039 | 0.010 | 205.24 | 394.1 | -0.365 | 2.13  |
| 32 |  | 1.810 | 0.012 | 0.060 | 0.060 | 0.048 | 165.83 | 300.2 | -1.173 | -0.58 |
| 33 |  | 1.790 | 0.011 | 0.076 | 0.043 | 0.033 | 184.46 | 330.2 | -0.824 | -0.42 |
| 34 |  | 1.870 | 0.027 | 0.071 | 0.036 | 0.018 | 224.67 | 420.1 | -0.457 | 1.96  |
| 35 |  | 1.680 | 0.019 | 0.065 | 0.037 | 0.028 | 215.57 | 362.2 | -0.663 | 0.17  |
| 36 |  | 1.760 | 0.035 | 0.055 | 0.035 | 0.014 | 288.69 | 508.1 | -0.378 | 2.85  |
| 37 |  | 1.900 | 0.044 | 0.057 | 0.032 | 0.006 | 314.77 | 598.1 | -0.187 | 3.78  |

|    |                                                                                     |       |       |       |       |       |        |       |        |       |
|----|-------------------------------------------------------------------------------------|-------|-------|-------|-------|-------|--------|-------|--------|-------|
| 38 | 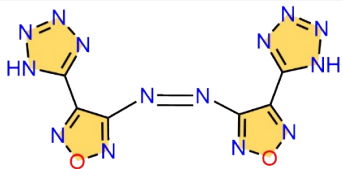   | 1.690 | 0.011 | 0.078 | 0.034 | 0.011 | 178.78 | 302.1 | -0.583 | -0.29 |
| 39 |    | 1.830 | 0.027 | 0.072 | 0.032 | 0.009 | 221.92 | 406.1 | -0.355 | 1.72  |
| 40 |    | 1.740 | 0.018 | 0.072 | 0.036 | 0.012 | 166.73 | 290.1 | -0.552 | -0.30 |
| 41 |    | 1.830 | 0.041 | 0.049 | 0.041 | 0.008 | 245.92 | 450.0 | -0.391 | 3.25  |
| 42 |    | 1.820 | 0.019 | 0.084 | 0.028 | 0.019 | 215.48 | 392.2 | -0.408 | 1.78  |
| 43 |   | 1.760 | 0.018 | 0.081 | 0.027 | 0.009 | 221.68 | 390.2 | -0.369 | 1.83  |
| 44 |  | 1.650 | 0.020 | 0.069 | 0.029 | 0.020 | 203.72 | 336.1 | -0.476 | -0.30 |
| 45 |  | 1.640 | 0.030 | 0.059 | 0.026 | 0.030 | 270.83 | 444.2 | -0.360 | -0.31 |
| 46 |  | 1.870 | 0.033 | 0.058 | 0.042 | 0.017 | 239.63 | 448.1 | -0.500 | 3.24  |
| 47 |  | 1.806 | 0.027 | 0.067 | 0.033 | 0.040 | 149.57 | 270.1 | -0.533 | 2.59  |
| 48 |  | 1.650 | 0.033 | 0.060 | 0.020 | 0.033 | 149.75 | 247.1 | -0.227 | -0.28 |

|    |                                                                                     |       |       |       |       |       |        |       |        |       |
|----|-------------------------------------------------------------------------------------|-------|-------|-------|-------|-------|--------|-------|--------|-------|
| 49 | 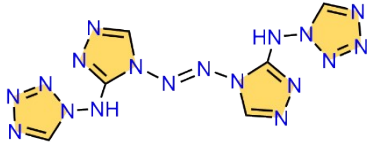   | 1.680 | 0.024 | 0.071 | 0.024 | 0.024 | 253.68 | 426.2 | -0.338 | -0.26 |
| 50 |    | 1.770 | 0.032 | 0.064 | 0.027 | 0.032 | 186.51 | 330.1 | -0.339 | 3.33  |
| 51 |    | 1.780 | 0.017 | 0.084 | 0.025 | 0.034 | 119.17 | 212.1 | -0.453 | 1.94  |
| 52 |    | 1.740 | 0.024 | 0.073 | 0.024 | 0.024 | 122.47 | 213.1 | -0.338 | 1.61  |
| 53 |    | 1.710 | 0.019 | 0.077 | 0.026 | 0.019 | 156.21 | 267.1 | -0.389 | -0.26 |
| 54 |   | 1.680 | 0.022 | 0.065 | 0.033 | 0.022 | 91.70  | 154.1 | -0.519 | -0.32 |
| 55 |  | 1.794 | 0.045 | 0.056 | 0.023 | 0.011 | 177.28 | 318.0 | -0.050 | 4.83  |
| 56 |  | 1.757 | 0.043 | 0.053 | 0.027 | 0.011 | 187.84 | 330.0 | -0.145 | 4.62  |
| 57 |  | 1.680 | 0.020 | 0.079 | 0.020 | 0.020 | 101.24 | 170.1 | -0.282 | -0.22 |
| 58 |  | 1.795 | 0.021 | 0.078 | 0.028 | 0.021 | 141.01 | 253.1 | -0.411 | -0.27 |
| 59 |  | 1.678 | 0.046 | 0.023 | 0.046 | 0.058 | 172.86 | 290.1 | -0.717 | 5.042 |

|    |                                                                                     |       |       |       |       |       |        |       |        |        |
|----|-------------------------------------------------------------------------------------|-------|-------|-------|-------|-------|--------|-------|--------|--------|
| 60 | 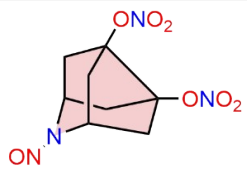   | 1.645 | 0.042 | 0.024 | 0.048 | 0.060 | 166.61 | 274.1 | -0.817 | 5.336  |
| 61 |    | 1.850 | 0.032 | 0.065 | 0.032 | 0.040 | 247.66 | 458.2 | -0.454 | 3.792  |
| 62 |    | 2.050 | 0.019 | 0.019 | 0.114 | 0.105 | 209.86 | 430.2 | -2.045 | -1.017 |
| 63 |    | 1.580 | 0.025 | 0.013 | 0.076 | 0.088 | 158.30 | 250.1 | -1.727 | 2.249  |
| 64 |    | 1.440 | 0.000 | 0.036 | 0.071 | 0.083 | 168.19 | 242.2 | -2.048 | -0.981 |
| 65 |    | 1.560 | 0.000 | 0.038 | 0.077 | 0.100 | 130.24 | 203.2 | -2.087 | -1.015 |
| 66 |   | 1.360 | 0.016 | 0.000 | 0.085 | 0.085 | 128.74 | 175.1 | -2.330 | -0.607 |
| 67 |  | 1.520 | 0.034 | 0.011 | 0.063 | 0.052 | 174.38 | 265.1 | -1.238 | 3.608  |
| 68 |  | 1.590 | 0.029 | 0.007 | 0.079 | 0.079 | 139.04 | 221.1 | -1.701 | 2.120  |
| 69 |  | 1.400 | 0.025 | 0.010 | 0.065 | 0.080 | 200.09 | 280.1 | -1.656 | 1.919  |
| 70 |  | 1.480 | 0.032 | 0.014 | 0.059 | 0.068 | 219.67 | 325.1 | -1.304 | 3.441  |
| 71 |  | 1.500 | 0.013 | 0.013 | 0.085 | 0.091 | 153.43 | 230.1 | -2.155 | -0.543 |

|    |                                                                                     |       |       |       |       |       |        |       |        |        |
|----|-------------------------------------------------------------------------------------|-------|-------|-------|-------|-------|--------|-------|--------|--------|
| 72 | 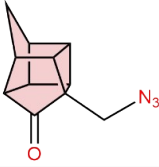   | 1.350 | 0.007 | 0.020 | 0.074 | 0.067 | 148.24 | 200.1 | -2.079 | -0.500 |
| 73 |    | 1.300 | 0.004 | 0.008 | 0.087 | 0.087 | 254.02 | 330.2 | -2.616 | -1.249 |
| 74 |    | 1.370 | 0.008 | 0.008 | 0.086 | 0.102 | 127.83 | 175.1 | -2.512 | -0.678 |
| 75 |    | 1.570 | 0.000 | 0.056 | 0.056 | 0.112 | 107.12 | 168.2 | -1.712 | -0.892 |
| 76 |   | 1.970 | 0.054 | 0.054 | 0.027 | 0.027 | 222.37 | 438.1 | -0.110 | 6.249  |
| 77 |  | 1.870 | 0.043 | 0.054 | 0.032 | 0.043 | 186.15 | 348.1 | -0.368 | 5.099  |
| 78 |  | 1.870 | 0.041 | 0.057 | 0.033 | 0.033 | 246.05 | 460.1 | -0.348 | 4.673  |
| 79 |  | 1.840 | 0.038 | 0.058 | 0.032 | 0.032 | 312.04 | 574.2 | -0.362 | 4.376  |
| 80 |  | 1.720 | 0.022 | 0.065 | 0.032 | 0.076 | 185.01 | 318.2 | -0.754 | 2.475  |
| 81 |  | 1.840 | 0.039 | 0.058 | 0.031 | 0.035 | 258.23 | 475.1 | -0.354 | 4.512  |



|    |                                                                                     |       |       |       |       |       |        |       |        |       |
|----|-------------------------------------------------------------------------------------|-------|-------|-------|-------|-------|--------|-------|--------|-------|
| 82 | 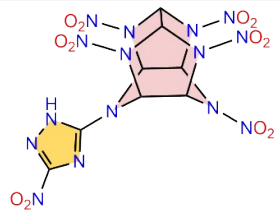   | 1.900 | 0.045 | 0.056 | 0.030 | 0.026 | 265.84 | 505.1 | -0.238 | 5.209 |
| 83 |    | 1.813 | 0.050 | 0.030 | 0.045 | 0.040 | 198.59 | 360.0 | -0.533 | 3.993 |
| 84 |    | 1.979 | 0.068 | 0.034 | 0.034 | 0.000 | 234.42 | 463.9 | 0.000  | 6.682 |
| 85 |    | 2.040 | 0.076 | 0.040 | 0.020 | 0.020 | 300.96 | 614.0 | 0.208  | 4.459 |
| 86 |   | 1.960 | 0.058 | 0.038 | 0.038 | 0.038 | 208.18 | 408.0 | -0.314 | 5.882 |
| 87 |  | 1.990 | 0.061 | 0.030 | 0.046 | 0.046 | 131.67 | 262.0 | -0.427 | 3.196 |
| 88 |  | 1.600 | 0.012 | 0.029 | 0.076 | 0.082 | 170.11 | 272.2 | -1.822 | 2.021 |
| 89 |  | 1.590 | 0.010 | 0.024 | 0.083 | 0.097 | 205.18 | 326.2 | -2.060 | 1.418 |
| 90 |  | 1.510 | 0.010 | 0.025 | 0.076 | 0.081 | 197.48 | 298.2 | -1.932 | 1.719 |
| 91 |  | 1.370 | 0.009 | 0.023 | 0.068 | 0.082 | 219.13 | 300.2 | -1.972 | 1.666 |
| 92 |  | 1.460 | 0.009 | 0.022 | 0.076 | 0.090 | 223.45 | 326.2 | -2.060 | 1.418 |

|     |                                                                                     |       |       |       |       |       |        |       |        |       |
|-----|-------------------------------------------------------------------------------------|-------|-------|-------|-------|-------|--------|-------|--------|-------|
| 93  | 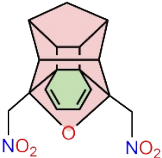   | 1.410 | 0.009 | 0.022 | 0.074 | 0.070 | 228.50 | 322.2 | -1.986 | 1.513 |
| 94  |    | 1.460 | 0.048 | 0.009 | 0.044 | 0.048 | 229.47 | 335.0 | -0.692 | 0.616 |
| 95  |    | 1.490 | 0.014 | 0.027 | 0.068 | 0.068 | 146.39 | 218.1 | -1.687 | 2.808 |
| 96  |    | 1.650 | 0.015 | 0.030 | 0.076 | 0.076 | 132.19 | 218.1 | -1.687 | 2.808 |
| 97  |   | 1.390 | 0.047 | 0.007 | 0.040 | 0.047 | 274.12 | 381.0 | -0.651 | 1.526 |
| 98  |  | 1.540 | 0.013 | 0.025 | 0.075 | 0.088 | 159.84 | 246.2 | -1.885 | 2.285 |
| 99  |  | 1.500 | 0.012 | 0.024 | 0.073 | 0.085 | 164.11 | 246.2 | -1.885 | 2.285 |
| 100 |  | 1.580 | 0.013 | 0.026 | 0.077 | 0.090 | 155.80 | 246.2 | -1.885 | 2.285 |
| 101 |  | 1.580 | 0.017 | 0.034 | 0.063 | 0.063 | 174.14 | 275.1 | -1.425 | 3.612 |
| 102 |  | 1.580 | 0.013 | 0.039 | 0.064 | 0.064 | 155.78 | 246.1 | -1.495 | 3.910 |

|     |                                                                                     |       |       |       |       |       |        |       |        |        |
|-----|-------------------------------------------------------------------------------------|-------|-------|-------|-------|-------|--------|-------|--------|--------|
| 103 | 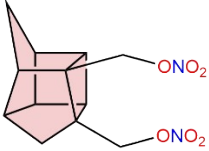   | 1.590 | 0.012 | 0.035 | 0.070 | 0.081 | 172.44 | 274.2 | -1.692 | 3.328  |
| 104 |    | 1.550 | 0.025 | 0.012 | 0.074 | 0.087 | 161.37 | 250.1 | -1.727 | 0.650  |
| 105 |    | 1.660 | 0.030 | 0.024 | 0.065 | 0.065 | 168.13 | 279.1 | -1.290 | 2.127  |
| 106 |    | 1.370 | 0.039 | 0.017 | 0.039 | 0.039 | 357.71 | 490.1 | -0.686 | -0.536 |
| 107 |   | 1.570 | 0.041 | 0.027 | 0.041 | 0.041 | 293.04 | 460.1 | -0.626 | -0.489 |
| 108 |  | 1.440 | 0.043 | 0.019 | 0.037 | 0.043 | 323.65 | 466.1 | -0.584 | -0.510 |
| 109 |  | 1.520 | 0.047 | 0.016 | 0.042 | 0.047 | 382.93 | 582.1 | -0.632 | -0.537 |
| 110 |  | 1.530 | 0.044 | 0.022 | 0.039 | 0.044 | 360.84 | 552.1 | -0.580 | -0.498 |
| 111 |  | 1.290 | 0.030 | 0.030 | 0.030 | 0.030 | 266.73 | 344.1 | -0.558 | -0.436 |
| 112 |  | 1.340 | 0.030 | 0.033 | 0.030 | 0.033 | 300.08 | 402.1 | -0.557 | -0.435 |
| 113 |  | 1.190 | 0.026 | 0.031 | 0.026 | 0.031 | 386.67 | 460.1 | -0.556 | -0.435 |
| 114 |  | 1.520 | 0.033 | 0.040 | 0.033 | 0.040 | 302.72 | 460.1 | -0.556 | -0.435 |

|     |                                                                                   |       |       |       |       |       |        |       |        |        |
|-----|-----------------------------------------------------------------------------------|-------|-------|-------|-------|-------|--------|-------|--------|--------|
| 115 | 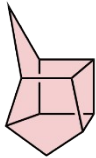 | 1.070 | 0.023 | 0.028 | 0.023 | 0.028 | 430.04 | 460.1 | -0.556 | -0.435 |
| 116 |  | 1.370 | 0.030 | 0.036 | 0.030 | 0.036 | 335.87 | 460.1 | -0.556 | -0.435 |
| 117 |  | 1.450 | 0.035 | 0.031 | 0.035 | 0.031 | 453.88 | 658.1 | -0.559 | -0.437 |
| 118 |  | 1.340 | 0.031 | 0.031 | 0.031 | 0.031 | 641.94 | 860.2 | -0.558 | -0.436 |

### New test set 2

|       |                                                                                     |       |       |       |       |       |        |       |        |       |
|-------|-------------------------------------------------------------------------------------|-------|-------|-------|-------|-------|--------|-------|--------|-------|
| 1(P5) | 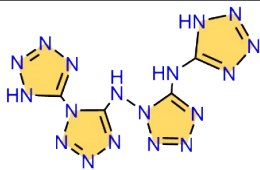  | 1.790 | 0.024 | 0.078 | 0.024 | 0.024 | 166.55 | 298.1 | -0.322 | -0.25 |
| 2(P6) |  | 1.570 | 0.025 | 0.025 | 0.062 | 0.075 | 160.59 | 252.1 | -1.396 | 2.975 |
| 3     |  | 1.880 | 0.022 | 0.078 | 0.034 | 0.022 | 178.80 | 336.1 | -0.476 | 2.53  |
| 4     |  | 1.8   | 0.027 | 0.059 | 0.043 | 0.016 | 185.05 | 333.1 | -0.600 | -0.36 |
| 5     |  | 1.89  | 0.034 | 0.057 | 0.045 | 0.011 | 176.75 | 334.1 | -0.527 | 0.26  |
| 6     |  | 1.85  | 0.038 | 0.056 | 0.038 | 0.009 | 213.01 | 394.1 | -0.365 | 2.13  |

|    |                                                                                     |       |       |       |       |       |        |       |        |        |
|----|-------------------------------------------------------------------------------------|-------|-------|-------|-------|-------|--------|-------|--------|--------|
| 7  | 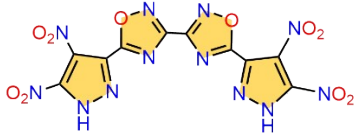   | 1.860 | 0.041 | 0.050 | 0.041 | 0.008 | 241.96 | 450.0 | -0.391 | 3.25   |
| 8  |    | 1.820 | 0.014 | 0.090 | 0.028 | 0.014 | 145.13 | 264.1 | -0.424 | -0.24  |
| 9  |    | 1.880 | 0.034 | 0.059 | 0.042 | 0.017 | 238.35 | 448.1 | -0.500 | 3.24   |
| 10 |    | 1.770 | 0.026 | 0.066 | 0.033 | 0.039 | 152.61 | 270.1 | -0.533 | 2.59   |
| 11 |    | 1.873 | 0.015 | 0.083 | 0.038 | 0.023 | 133.01 | 249.1 | -0.610 | 1.28   |
| 12 |   | 1.490 | 0.020 | 0.024 | 0.063 | 0.073 | 204.81 | 305.2 | -1.547 | 1.782  |
| 13 |  | 1.960 | 0.041 | 0.062 | 0.031 | 0.052 | 192.93 | 378.1 | -0.381 | 4.661  |
| 14 |  | 1.790 | 0.028 | 0.055 | 0.042 | 0.069 | 144.21 | 258.1 | -0.806 | 3.148  |
| 15 |  | 1.440 | 0.009 | 0.022 | 0.075 | 0.088 | 226.55 | 326.2 | -2.060 | 1.418  |
| 16 |  | 1.390 | 0.022 | 0.022 | 0.055 | 0.066 | 181.38 | 252.1 | -1.396 | 2.975  |
| 17 |  | 1.480 | 0.040 | 0.024 | 0.040 | 0.040 | 252.74 | 374.1 | -0.642 | -0.501 |

**Table S10.** The dataset of new energetic compounds.

| NO. | Name  | $\rho$ | nO/ $V_m$ | nN/ $V_m$ | nC/ $V_m$ | nH/ $V_m$ | $V_m$  | $M$   | OB     | $F$  |
|-----|-------|--------|-----------|-----------|-----------|-----------|--------|-------|--------|------|
| 1   | NEC1  | 1.80   | 0.054     | 0.039     | 0.031     | 0.047     | 128.93 | 232.1 | -0.414 | 3.07 |
| 2   | NEC2  | 1.81   | 0.050     | 0.044     | 0.031     | 0.044     | 160.82 | 291.1 | -0.357 | 3.76 |
| 3   | NEC3  | 1.79   | 0.063     | 0.031     | 0.031     | 0.031     | 127.42 | 228.1 | -0.421 | 3.18 |
| 4   | NEC4  | 1.77   | 0.053     | 0.035     | 0.035     | 0.041     | 170.11 | 301.1 | -0.505 | 3.59 |
| 5   | NEC5  | 1.89   | 0.077     | 0.031     | 0.026     | 0.015     | 195.30 | 369.1 | -0.238 | 3.44 |
| 6   | NEC6  | 1.88   | 0.078     | 0.029     | 0.024     | 0.020     | 204.33 | 384.1 | -0.250 | 3.29 |
| 7   | NEC7  | 1.94   | 0.055     | 0.049     | 0.031     | 0.006     | 162.38 | 315.0 | -0.127 | 4.15 |
| 8   | NEC8  | 1.91   | 0.052     | 0.046     | 0.035     | 0.017     | 172.27 | 329.0 | -0.267 | 3.89 |
| 9   | NEC9  | 1.91   | 0.073     | 0.034     | 0.021     | 0.009     | 233.47 | 445.9 | 0.215  | 4.09 |
| 10  | NEC10 | 1.92   | 0.076     | 0.032     | 0.020     | 0.016     | 249.96 | 479.9 | 0.233  | 3.15 |
| 11  | NEC11 | 1.92   | 0.035     | 0.056     | 0.045     | 0.042     | 287.59 | 552.2 | -0.637 | 5.64 |
| 12  | NEC12 | 1.94   | 0.036     | 0.061     | 0.040     | 0.030     | 328.96 | 638.2 | -0.476 | 6.15 |

**Table S11.** The  $D$  prediction results of three isomers

| NO. | Structure <sup>a)</sup>                                                           | $\rho/\text{g}\cdot\text{cm}^{-3}$ | $D/\text{km}\cdot\text{s}^{-1}$ | Predicted $D$<br>$/\text{km}\cdot\text{s}^{-1}$ | Relative error<br>$/\%$ |
|-----|-----------------------------------------------------------------------------------|------------------------------------|---------------------------------|-------------------------------------------------|-------------------------|
| I1  | 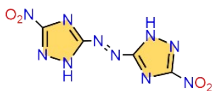 | 1.800                              | 8.574 <sup>b)</sup>             | 8.941                                           | 4.280                   |
|     |                                                                                   | 1.880                              | 8.952                           | 8.998                                           | 0.514                   |
| I2  |  | 1.800                              | 8.990 <sup>b)</sup>             | 8.941                                           | -0.545                  |
|     |                                                                                   | 1.777                              | 8.916                           | 8.922                                           | 0.067                   |
| I3  |  | 1.800                              | 8.935 <sup>b)</sup>             | 8.941                                           | 0.067                   |
|     |                                                                                   | 1.795                              | 8.917                           | 8.937                                           | 0.224                   |

a) I1 is 3 from Yu's work (Z. Anorg. Allg. Chem. 2020); I2 and I3 is N8L and N8B from Lai's work (Chem. Eng. J. 2021).

b) These data were computed by EXPLO5.

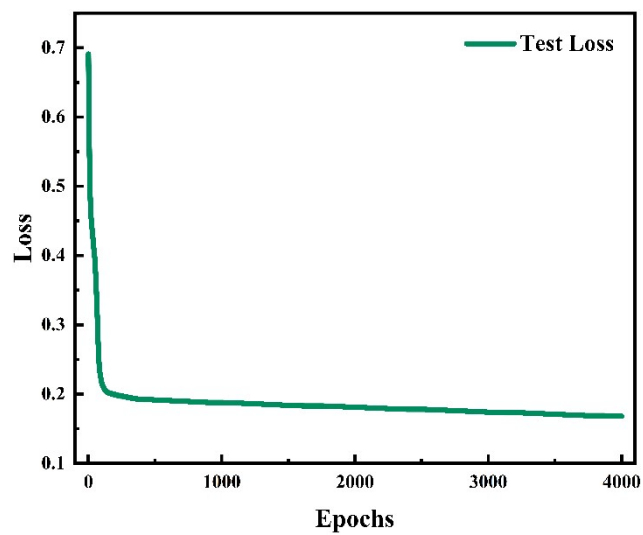

**Figure S1.** The loss function of ML models



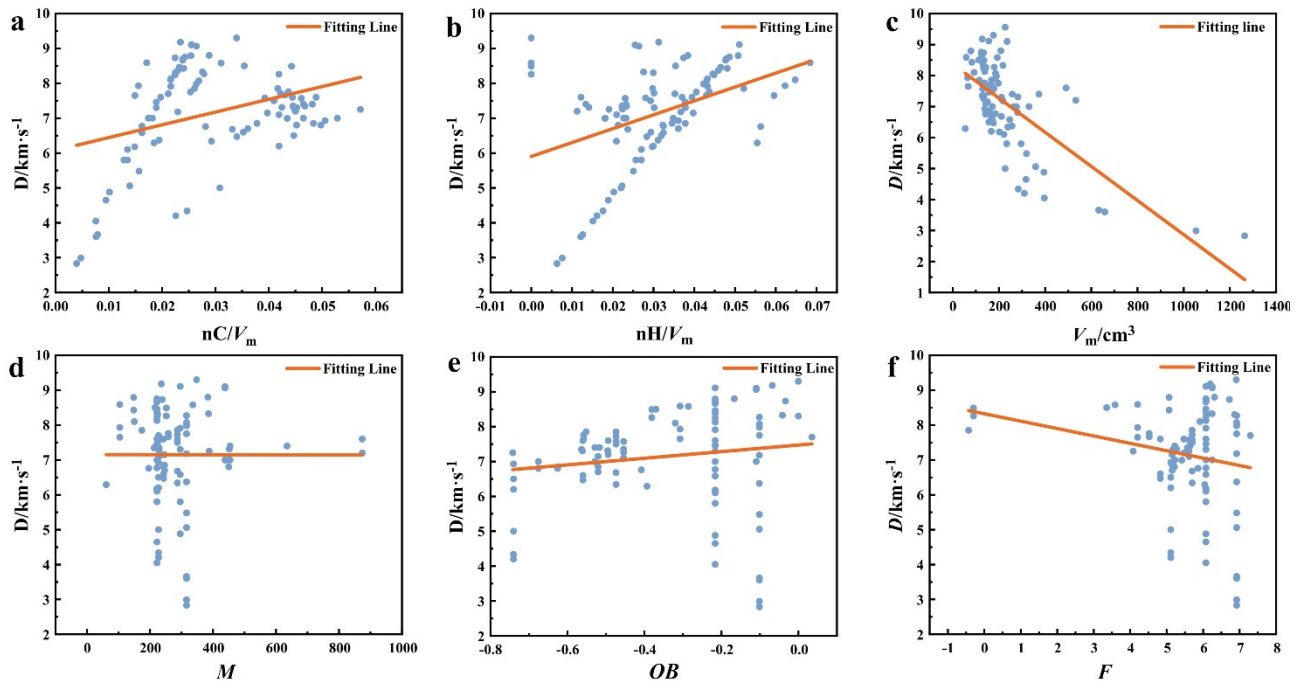

**Figure S2.** The relationships between  $nC/V_m$ ,  $nH/V_m$ ,  $V_m$ ,  $M$ ,  $OB$ ,  $F$  and experimental  $D$  results

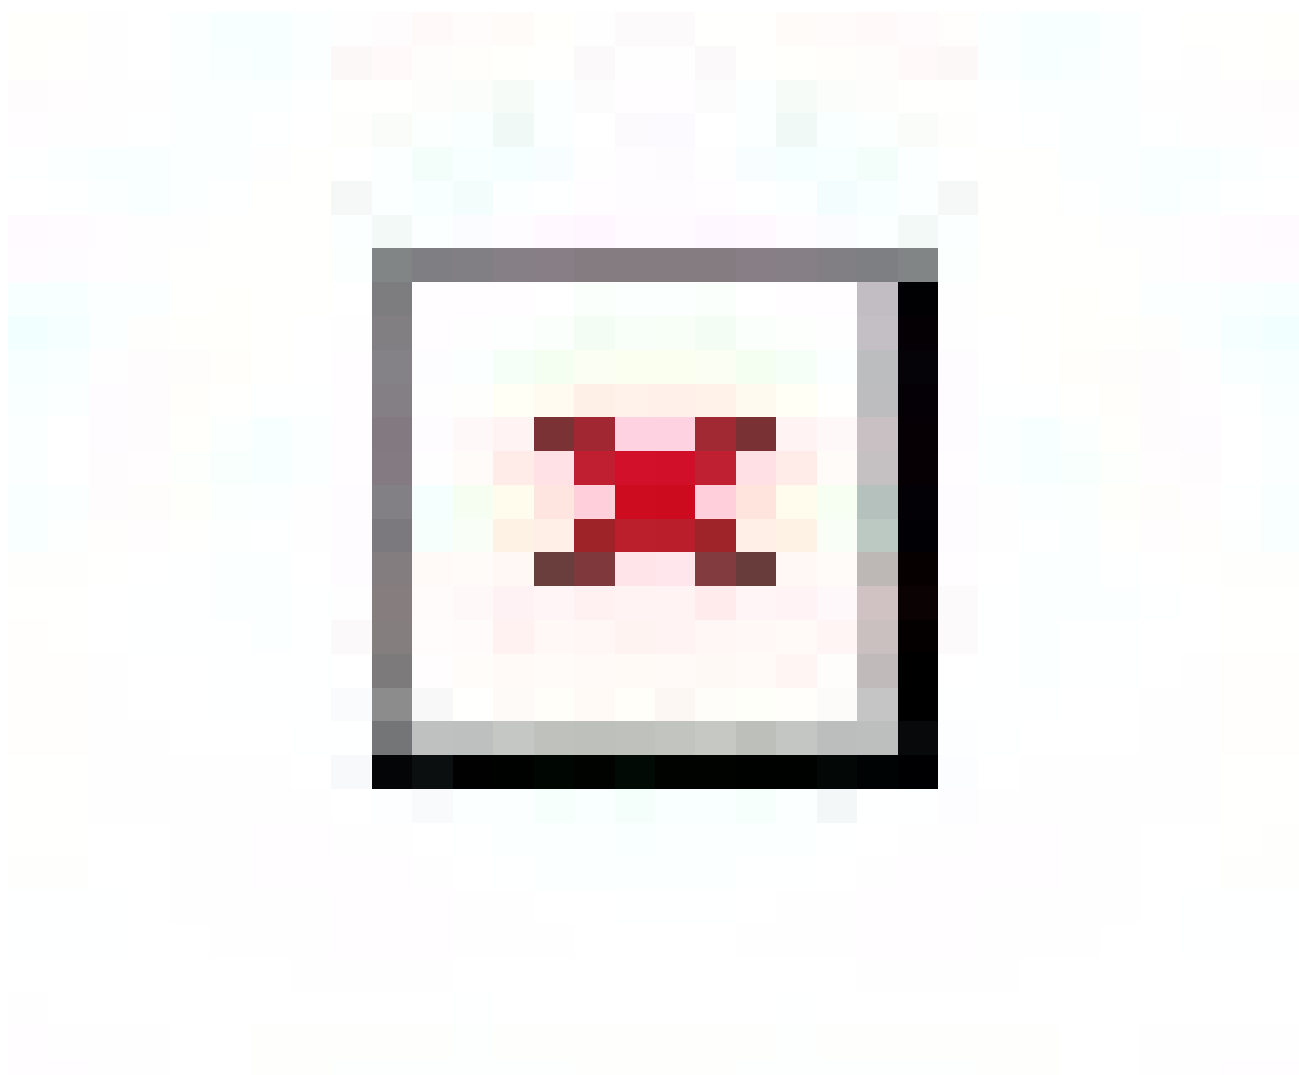

**Figure S3.** The scatter graph of the training/test set showing the  $D$  predicted vs experimental values:

(a)BPNN, (b)MLP, (c)RF and (d)SVR models

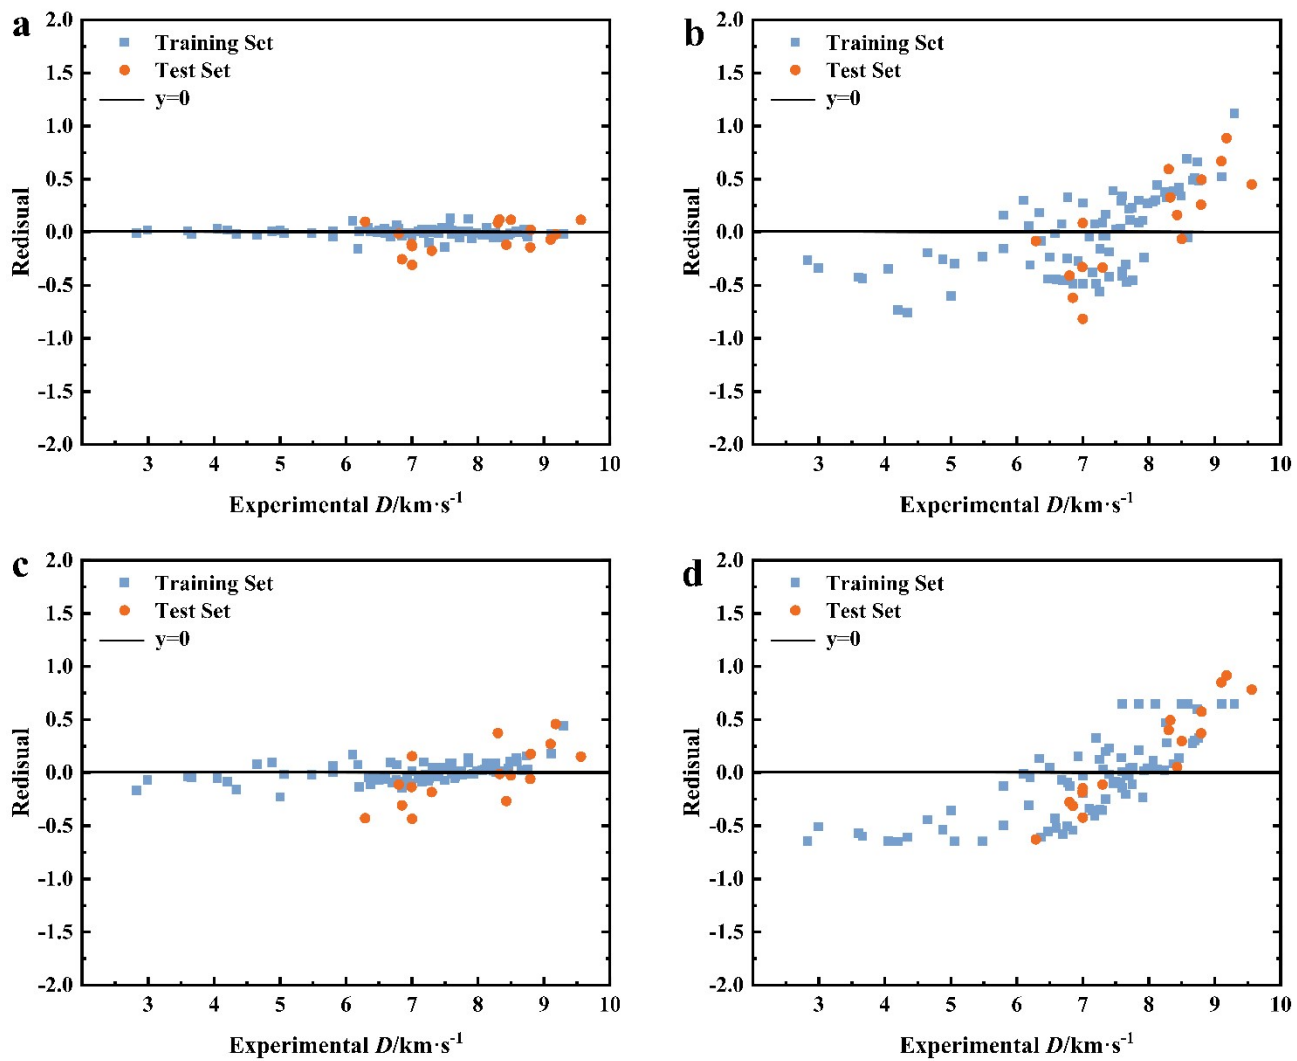

**Figure S4.** The predicted residual plot of (a)BPNN, (b)MLP, (c)RF and (d)SVR models for the  $D$

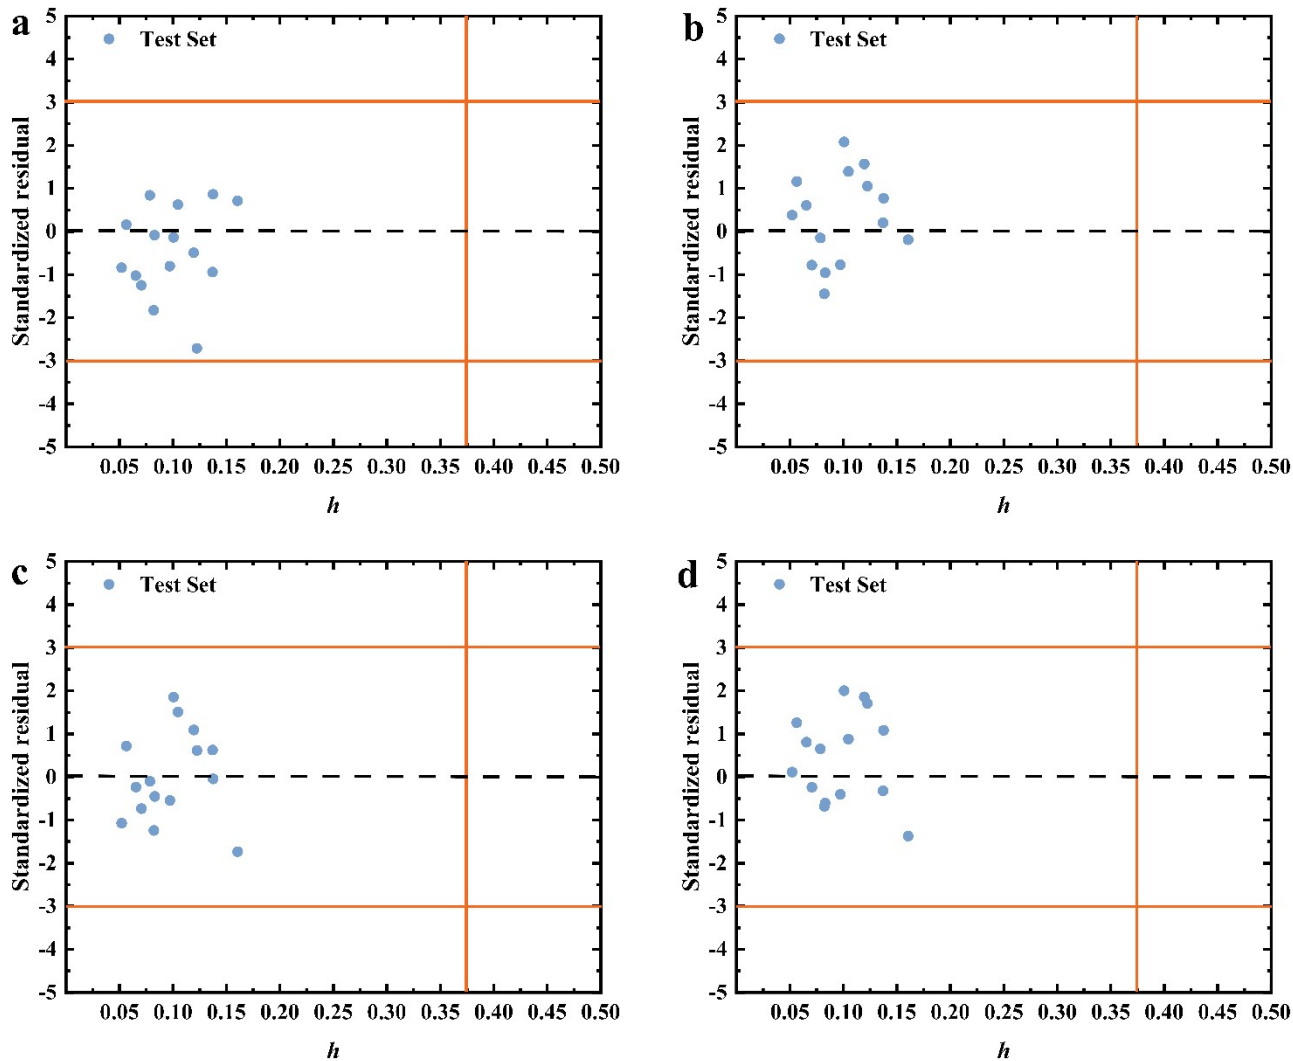

**Figure S5.** The Williams plot of (a)BPNN, (b)MLP, (c)RF and (d)SVR models for the test set of the  $D$

## References

- 1 X. Xiong, M.D. thesis, Southwest University of Science and Technology, 2020.
- 2 L. Zhai, F. Bi, Y. Luo, N. Wang, J. Zhang, B. Wang, *Scientific Reports*, 2019, **9**, 4321.
- 3 Y. Tang, W. Huang, G.H. Imler, D.A. Parrish, J.M. Shreeve, 2020, **142**, 7153-7160.
- 4 H. Li, L. Zhang, N. Petrutik, K. Wang, Q. Ma, D. Shem-Tov, F. Zhao, M. Gozin, *ACS Central Science*, 2020, **6**, 54–75.
- 5 W. Huang, Y. Tang, G.H. Imler, D.A. Parrish, J.M. Shreeve, 2020, *Journal of the American Chemical Society*, 2020, **142**, 3652–3657.
- 6 S. Feng, P. Yin, C. He, S. Pang, J. M. Shreeve, *J. Mater. Chem. A*, 2021, **9**, 12291–12298.
- 7 M. Reichel, B. Krumm, Y. V. Vishnevskiy, S. Blomeyer, J. Schwabedissen, H.-G. Stammer, K. Karaghiosoff, N. W. Mitzel, *Angew. Chem. Int. Ed.*, 2019, **58**, 18557–18561.
- 8 M. Reichel, B. Krumm, Y. V. Vishnevskiy, S. Blomeyer, J. Schwabedissen, H.-G. Stammer, K. Karaghiosoff, N. W. Mitzel, *Angew. Chem. Int. Ed.*, 2019, **58**, 18557–18561.
- 9 Y. Wang, L. Hu, S. Pang, J. M. Shreeve, *J. Mater. Chem. A*, 2023, **11**, 13876–13888.
- 10 W. Huang, Y. Tang, G. H. Imler, D. A. Parrish, J. M. Shreeve, *J. Am. Chem. Soc.*, 2020, **142**, 3652-3657.
- 11 C. Li, T. Zhu, C. Lei, G. Cheng, C. Xiao, H. Yang, *J. Mater. Chem. A*, 2023, **11**, 12043–12051.
- 12 R. Yang, Z. Dong, Y. Liu, Y. Liu, H. Li, G. Zhang, Z. Ye, *Chem. Eng. J.*, 2022, **429**, 132503.
- 13 J. Ma, A. K. Chinnam, G. Cheng, H. Yang, J. Zhang, J. M. Shreeve, *Angew. Chem-ger. Edit.*, 2021, **133**, 5557–5564.
- 14 H. Dou, P. Chen, L. Hu, C. He, S. Pang, *Chem. Eng. J.*, 2022, **444**, 136708.
- 15 S. Banik, A. Kumar Yadav, P. Kumar, V. D. Ghule, S. Dharavath, *Chem. Eng. J.*, 2022, **431**, 133378.
- 16 X. Jiang, Y. Yang, H. Du, B. Yang, P. Tang, B. Wu, C. Ma, *Dalton Trans.*, 2023, **52**, 5226–5233.
- 17 Y. Li, X. Wang, M. Xue, *New J. Chem.*, 2023, **47**, 19191–19201.
- 18 L. Mallick, S. Lal, S. Reshmi, I. N. N. Namboothiri, A. Chowdhury, N. Kumbhakarna, *New J. Chem.*, 2017, **41**, 920–930.
- 19 S. Lal, S. Rao Cheekatla, A. Suresh, N. Ayyagari, L. Mallick, G. Pallikonda, P. Desai, P. Ahirwar, A. Chowdhury, N. Kumbhakarna, I. N. N. Namboothiri, *Chemistry – A European Journal*, 2024, **30**, e202401265.
- 20 L. Zhu, Q. Zhou, W. Wang, H. Li, B. Li, Y. Zhang, J. Luo, *Energetic Materials Frontiers*, 2024, DOI:10.1016/j.enmf.2024.06.005.
- 21 J. Cai, C. Xie, J. Xiong, J. Zhang, P. Yin, S. Pang, *Chem. Eng. J.*, 2022, **433**, 134480.

- 22 S. Banik, P. Kumar, V. D. Ghule, S. Khanna, D. Allimuthu, S. Dharavath, *J. Mater. Chem.a*, 2022, **10**, 22803–22811.
- 23 L. Zhang, Q. Lang, M. Zhu, X. Zhang, S. Jiang, M. Lu, Q. Lin, *ACS Appl. Mater. Interfaces*, 2024, **16**, 10211–10217.
- 24 S. Kotha, M. Salman, S. Lal, S. Rao Cheekatla, S. Ansari, *Asian J. Org. Chem.*, 2023, **12**, e202300060.
- 25 Y. Xu, L. Ding, D. Li, Z. Xu, P. Wang, Q. Lin, M. Lu, *J. Mater. Chem. A*, 2024, **12**, 17714–17729.
- 26 P. Maksimowski, T. Gołofit, *J. Energ. Mater.*, 2013, **31**, 224–237.
- 27 T. Hou, H. Ruan, G. Wang, J. Luo, *Eur. J. Org. Chem.*, 2017, **2017**, 6957–6960.
